# Supplementary material
Source: PubMed Central journal article supplement (PMC5677561)

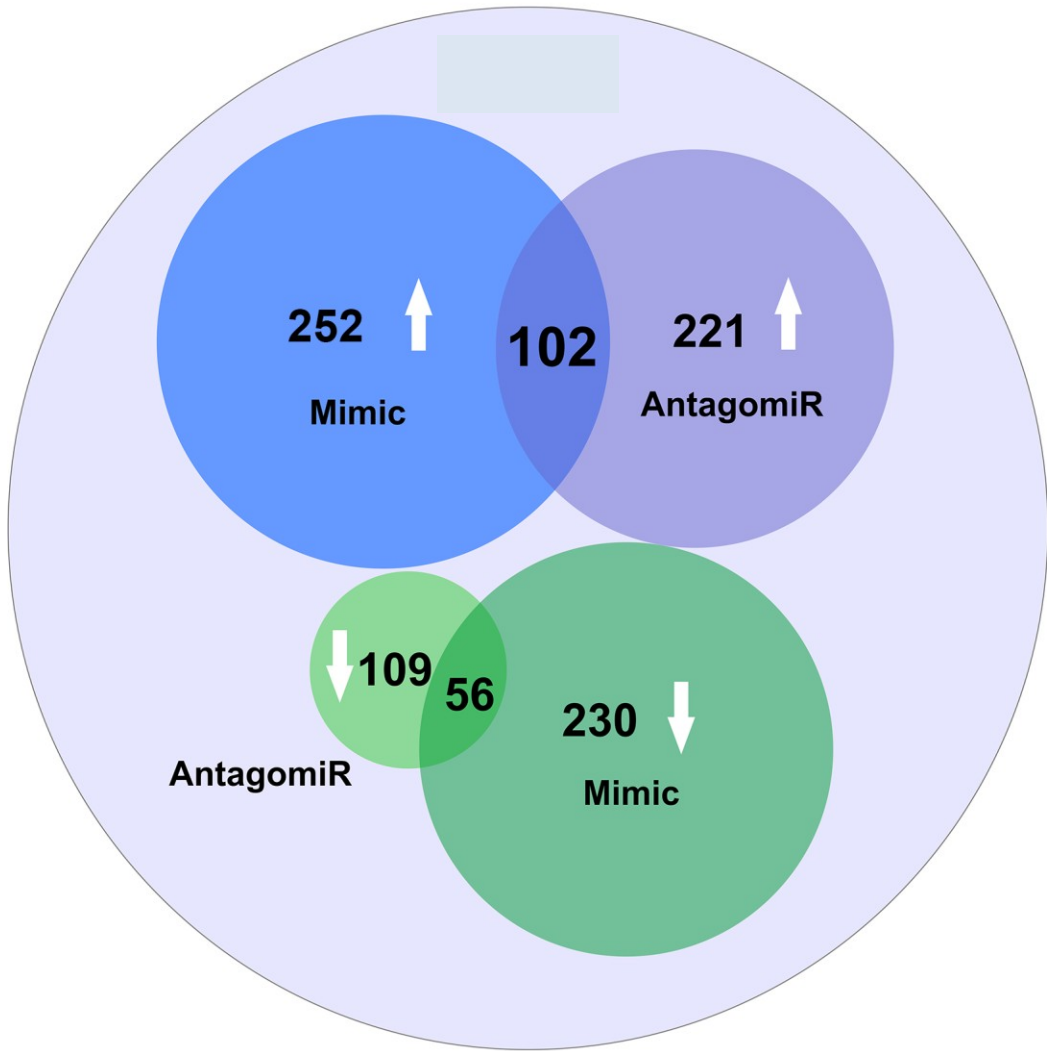

↑↓ down or up regulation

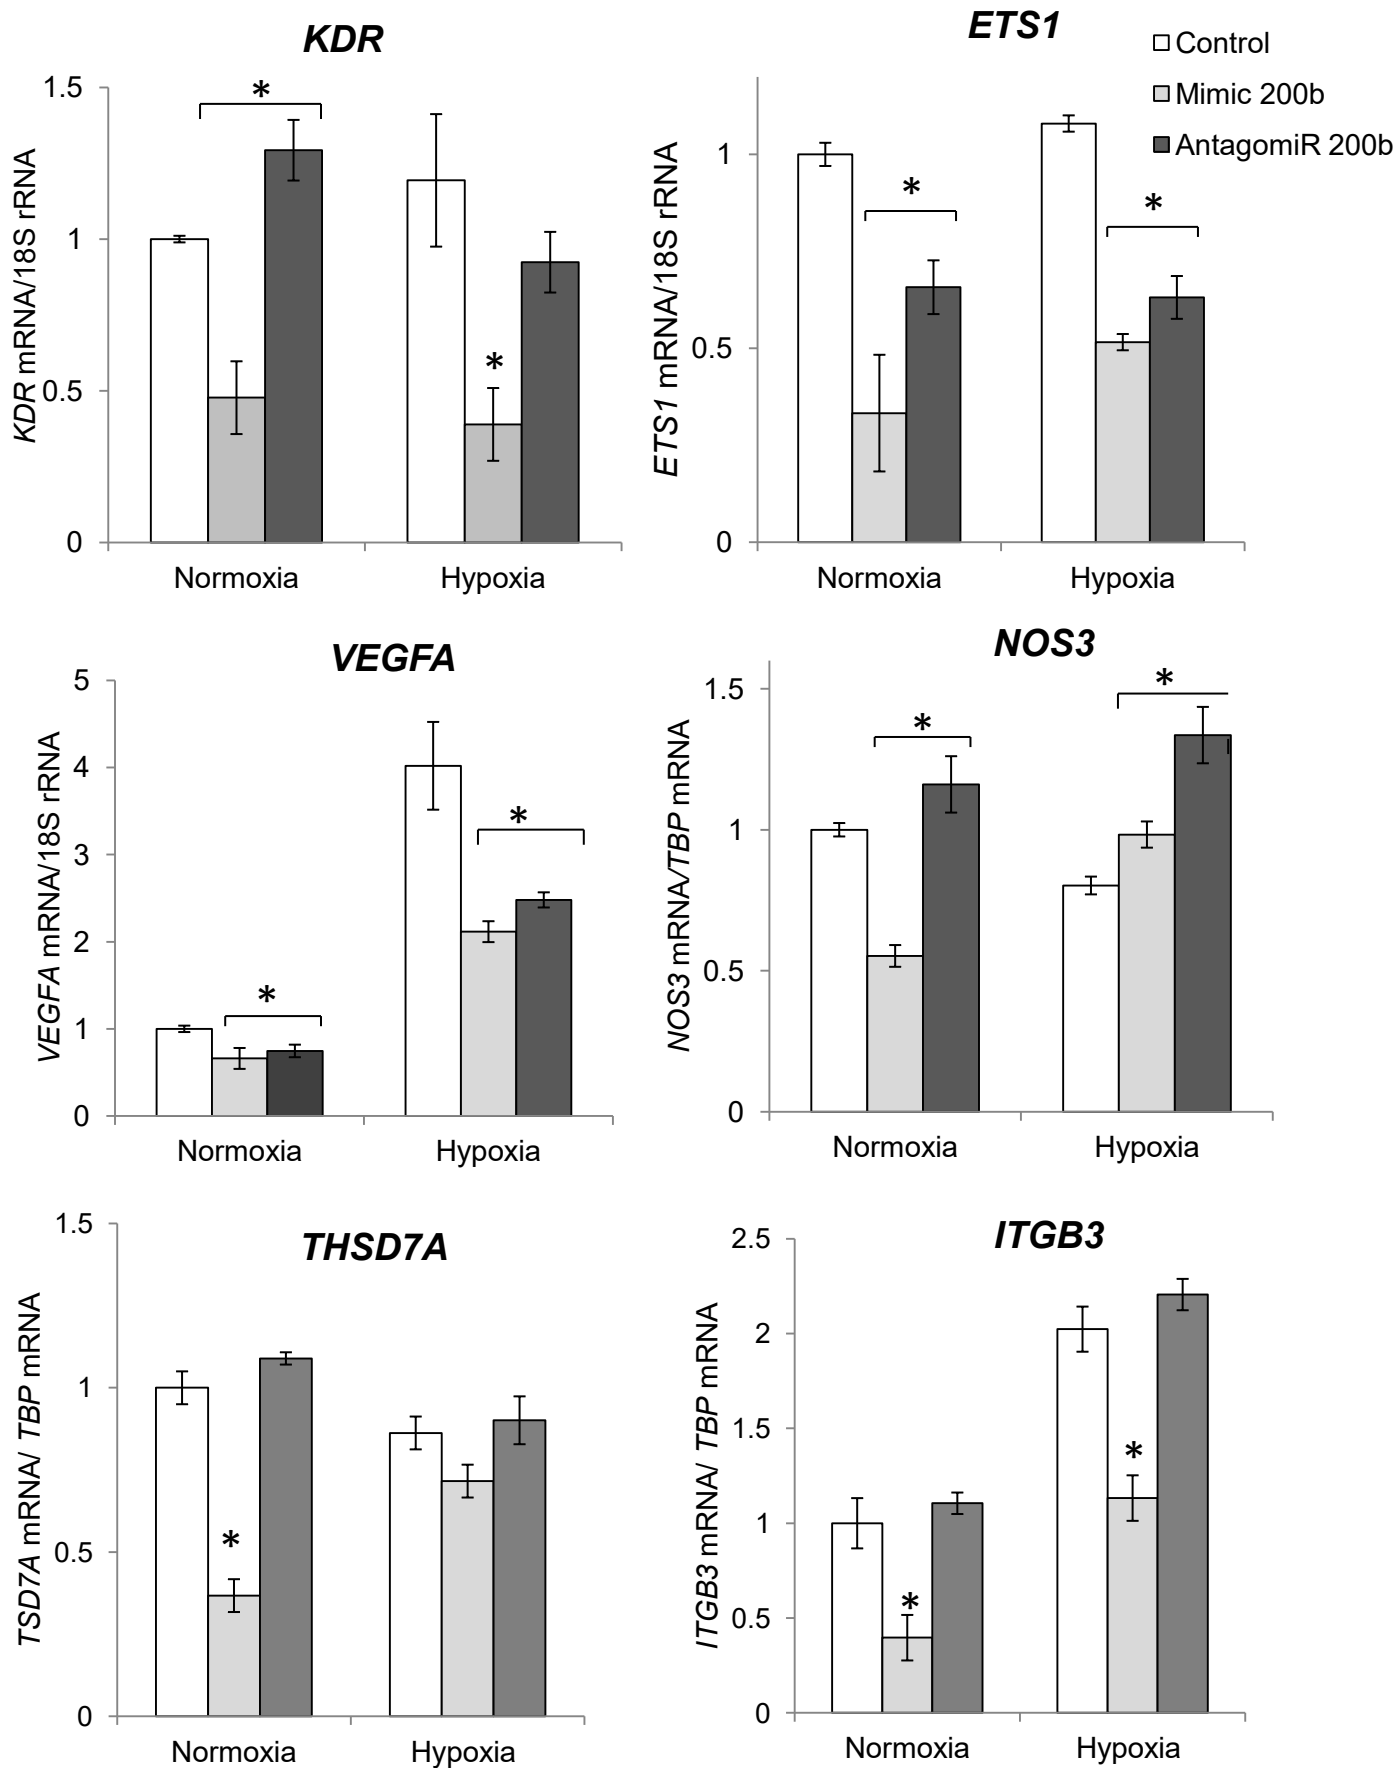

# Supportive Figure 2 part 2

Control  
 Mimic 200B  
 Antagomir 200B

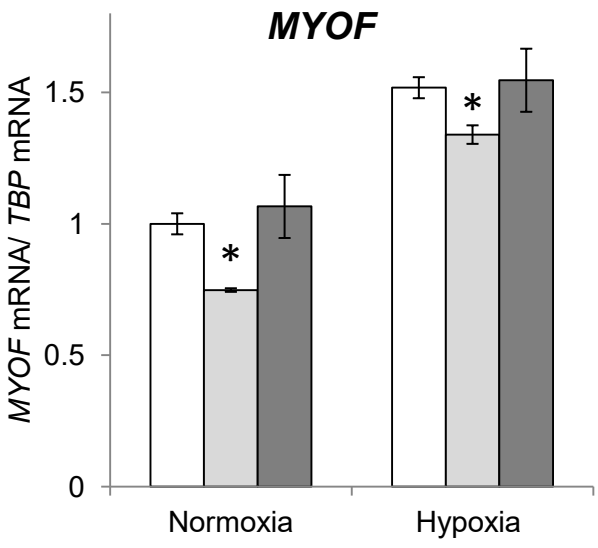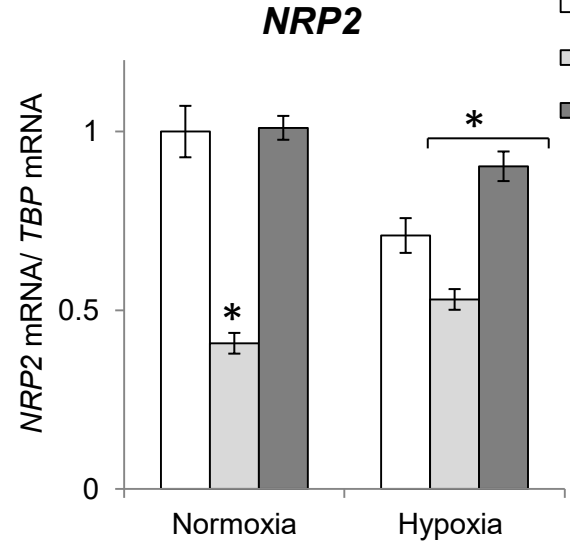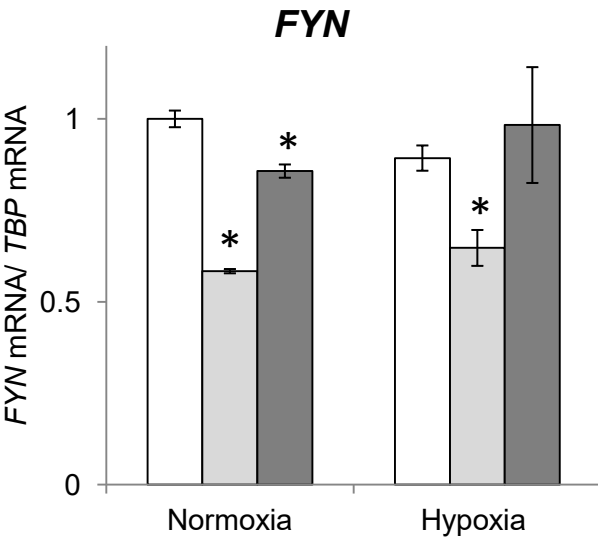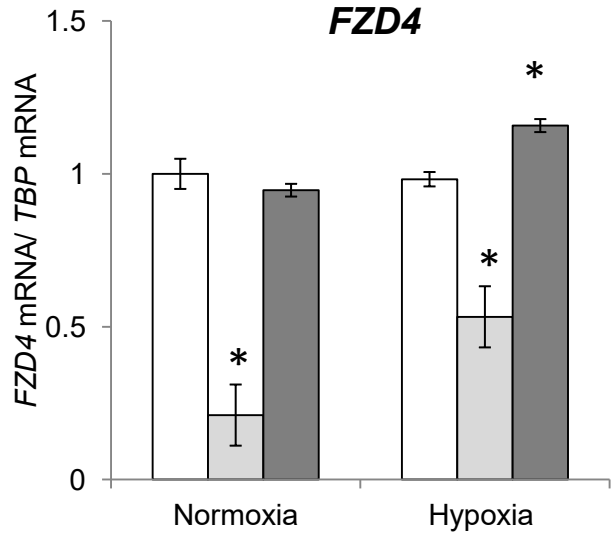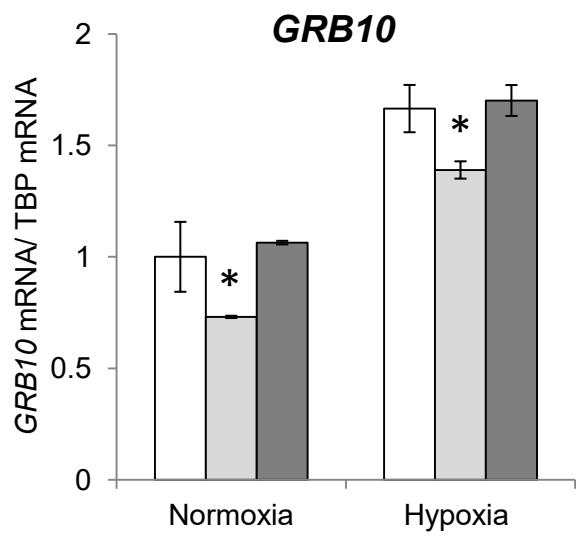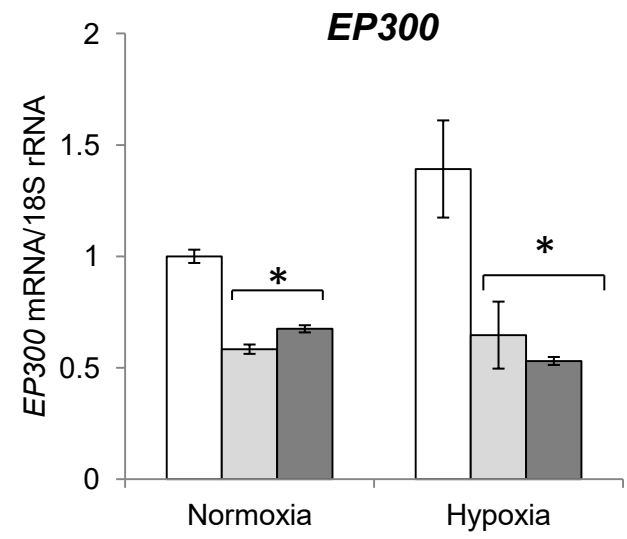

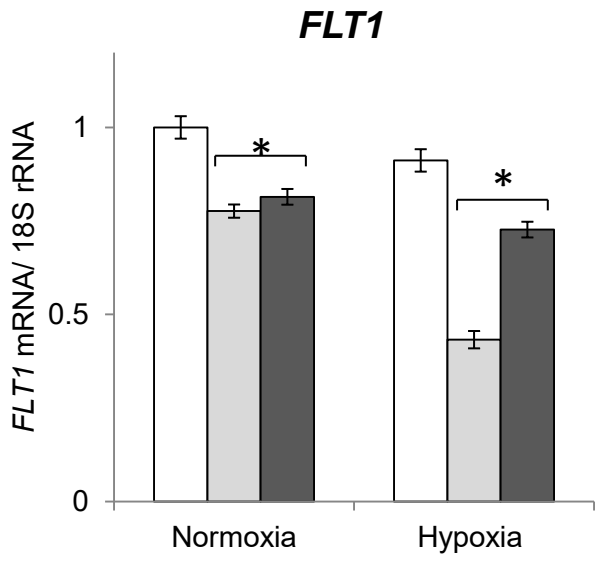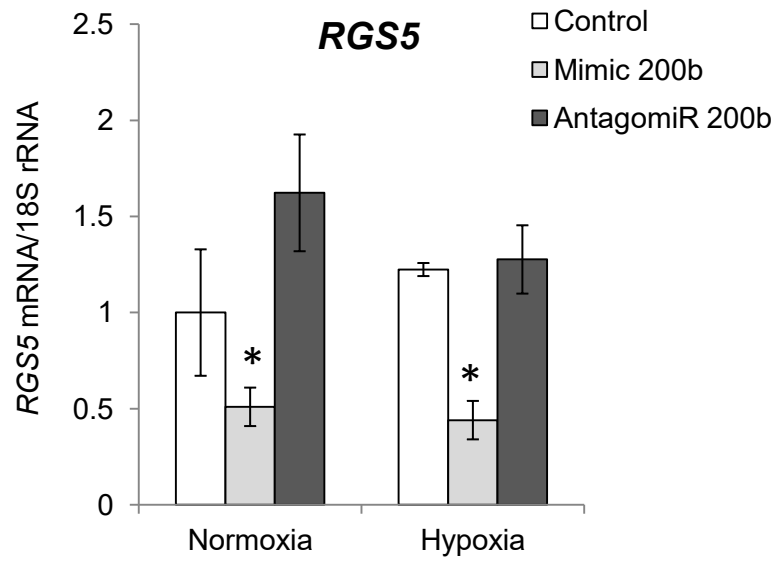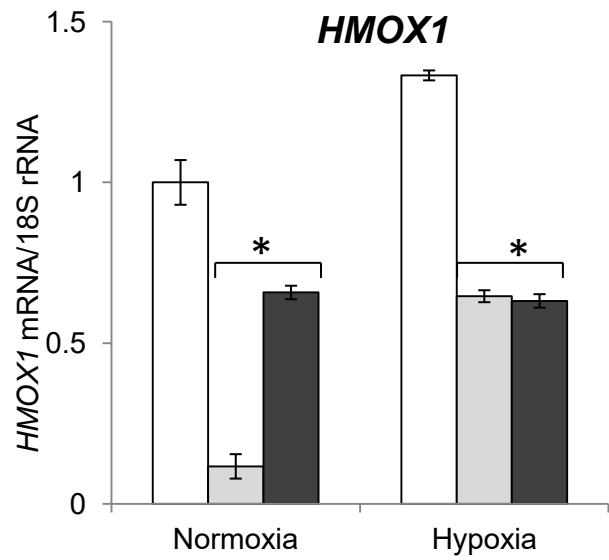

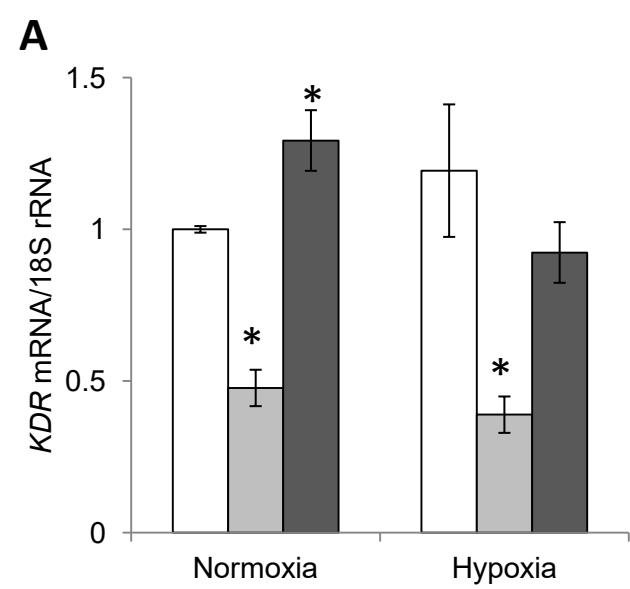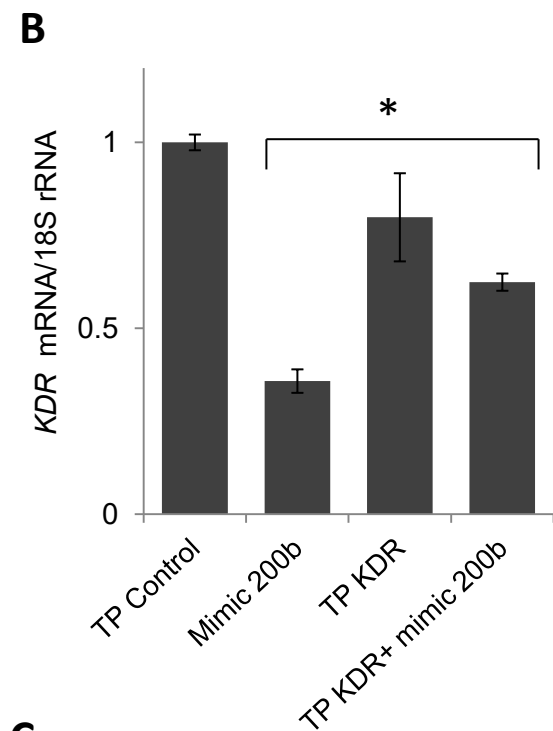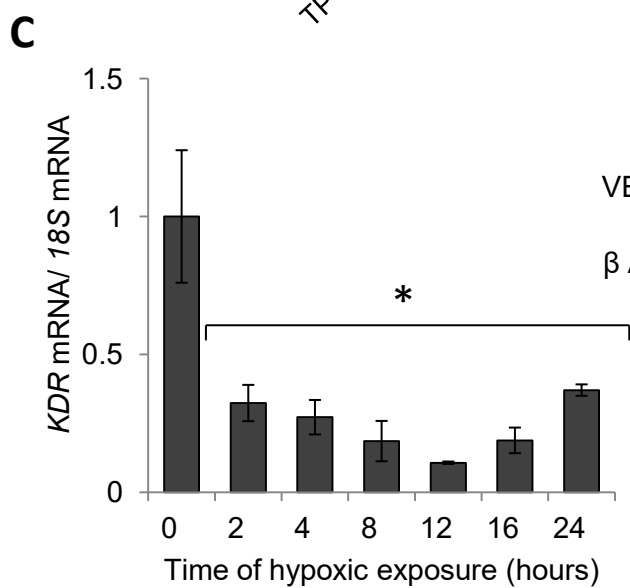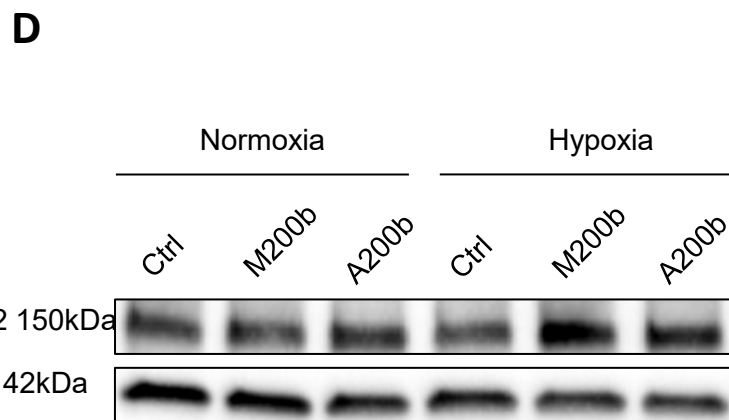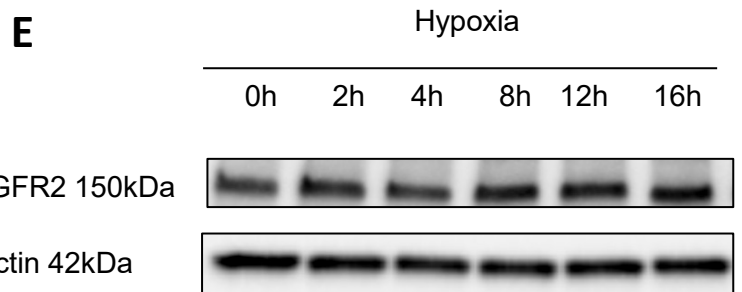

Supplement: NIHMS913277-supplement-1.pdf [file NIHMS913277-supplement-1.pdf]
